# Supplementary material for: Predicting recognition between T cell receptors and epitopes with TCRGP
Source: PubMed Central journal article supplement (PMC8023491; doi:10.1371/journal.pcbi.1008814), 2021-03-25

## TCRGP

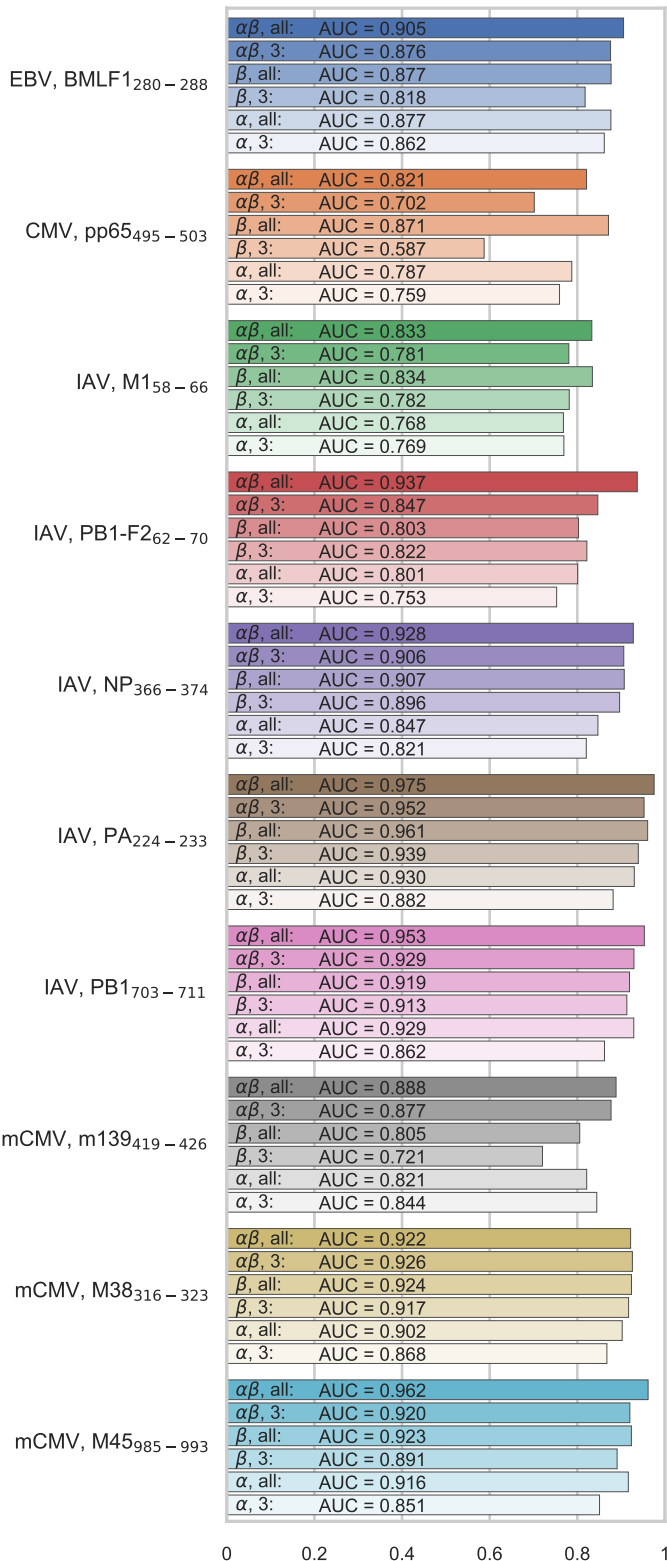

## TCRdist

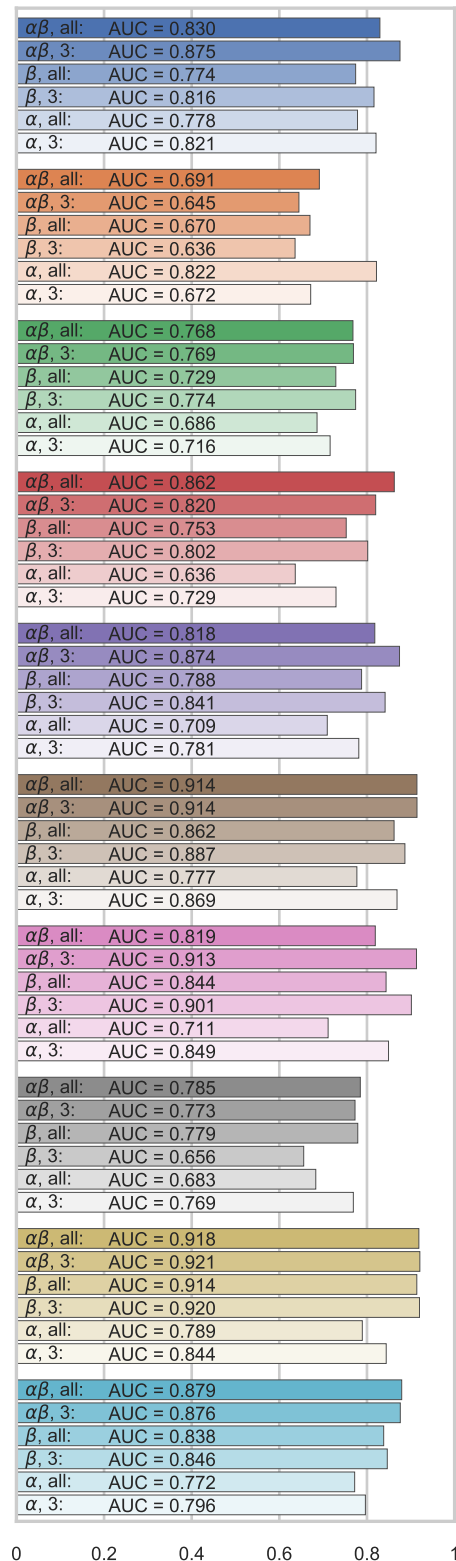

Supplement: pcbi.1008814.s001.pdf [file pcbi.1008814.s001.pdf]
