# Supplementary material for: Predicting recognition between T cell receptors and epitopes with TCRGP
Source: PubMed Central journal article supplement (PMC8023491; doi:10.1371/journal.pcbi.1008814), 2021-03-25

A

$$\text{diversity}(s, t) = \left( \frac{\sum_{i=0}^{N_s} \sum_{j=0}^{N_t} \exp\left(-\frac{\|\mathbf{x}_{s,i} - \mathbf{x}_{t,j}\|^2}{2l^2}\right)}{N_s N_t} \right)^{-1}$$

diversity( $s, t$ ) describes the diversity between subjects  $s$  and  $t$ .  $N_s$  and  $N_t$  are numbers of TCRs  $\mathbf{x}_{s,i}$  and  $\mathbf{x}_{t,j}$  for the subjects  $s$  and  $t$ , respectively.

B

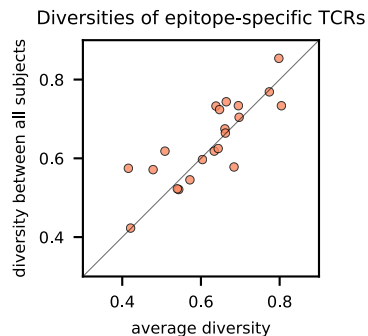

C

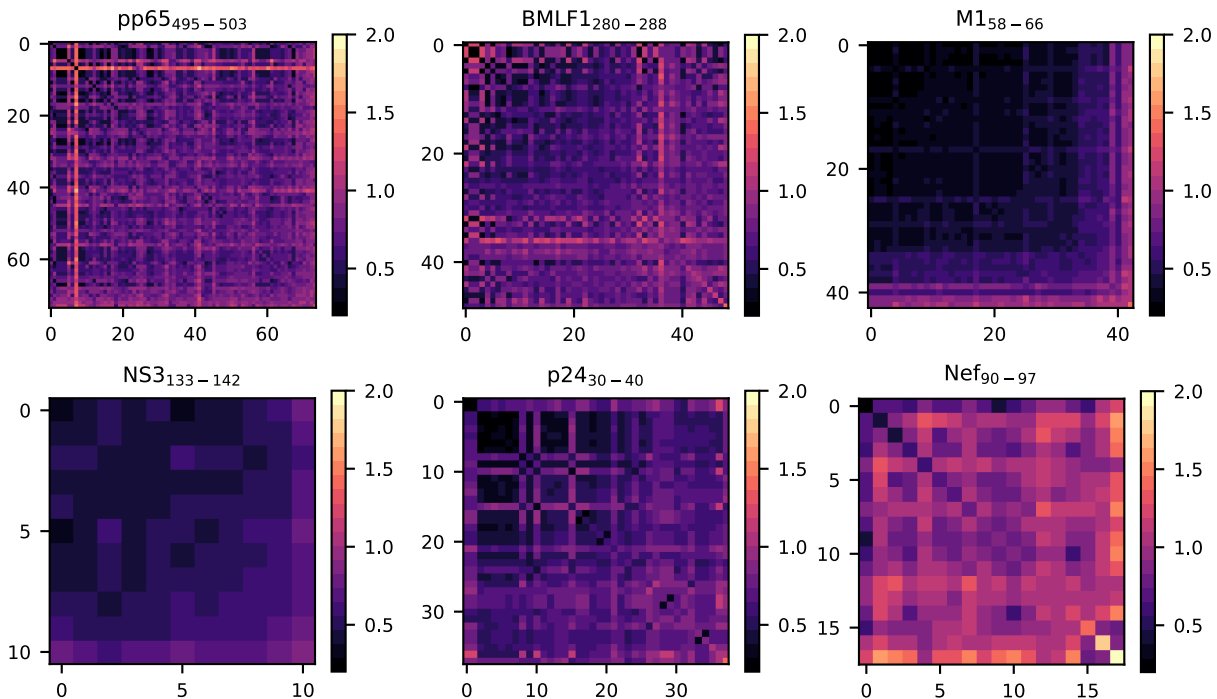

Supplement: pcbi.1008814.s008.pdf [file pcbi.1008814.s008.pdf]
