# Supplementary material for: Predicting recognition between T cell receptors and epitopes with TCRGP
Source: PubMed Central journal article supplement (PMC8023491; doi:10.1371/journal.pcbi.1008814), 2021-03-25

all CDR $\beta$ s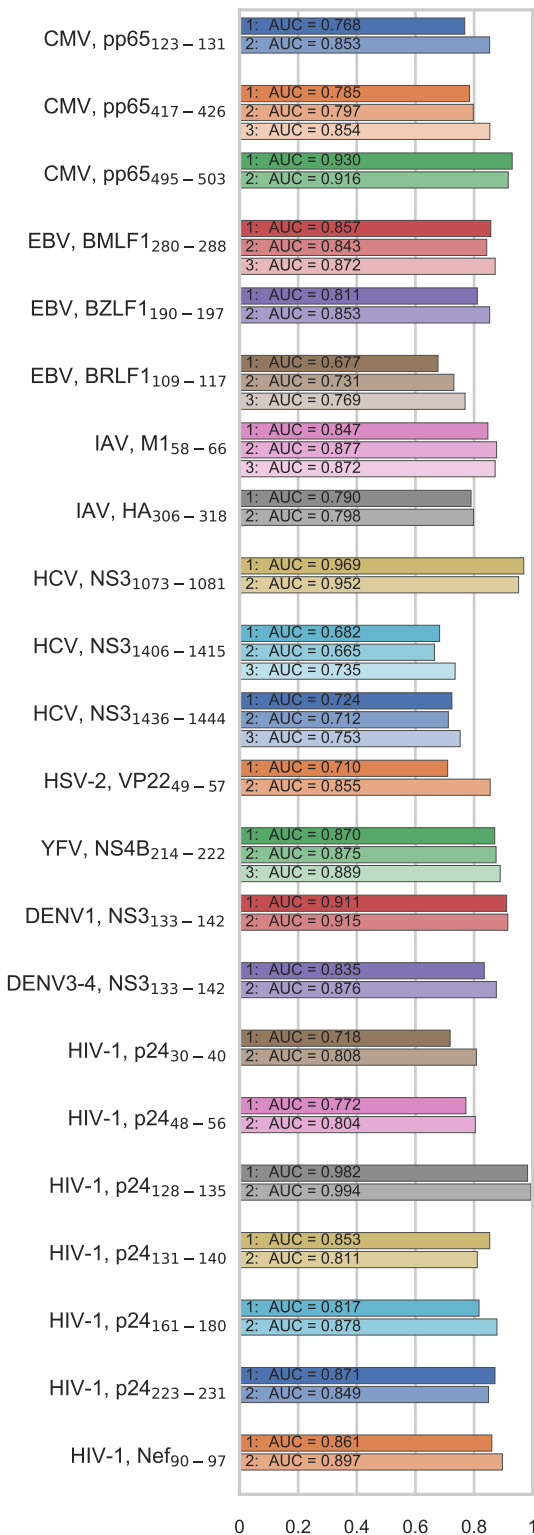CDR3 $\beta$ 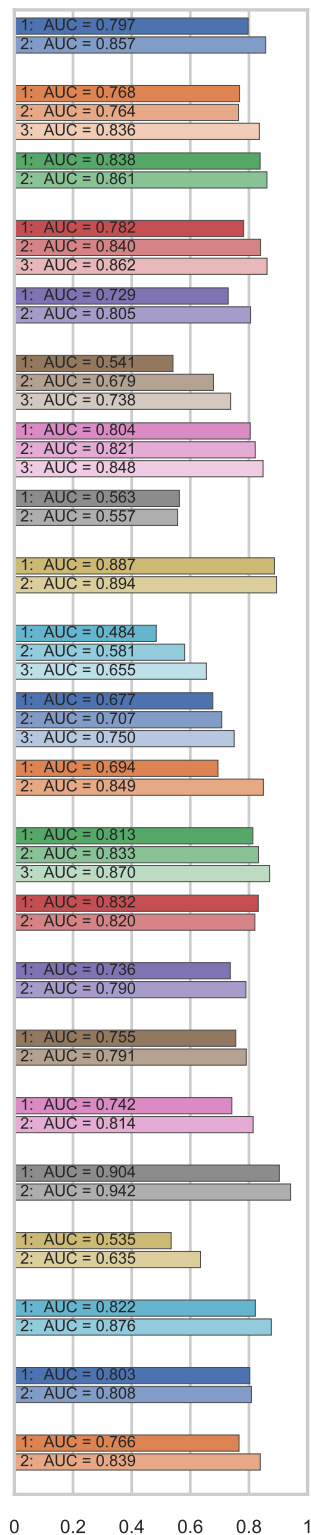

Supplement: pcbi.1008814.s009.pdf [file pcbi.1008814.s009.pdf]
