# Supplementary material for: Predicting recognition between T cell receptors and epitopes with TCRGP
Source: PLoS Comput Biol. 2021 Mar 25;17(3):e1008814. doi: 10.1371/journal.pcbi.1008814 (PMC8023491; doi:10.1371/journal.pcbi.1008814)
Supplement: S1 File — (XLSX) [file pcbi.1008814.s010.xlsx]

## Sheet: Dash data
Leave-one-subject-out (LOSO), mean AUROCs over all subjects. Highest AUROC-score in each column is bolded.
Method	CV	chains	cdrs	mean	M1	pp65	BMLF	F2	m139	PA	NP	PB1	M38	M45
TCRGP	LOSO	AB	all	0.91239	0.8331	0.821	0.9055	0.9368	0.8884	0.9753	0.9278	0.9529	0.9216	0.9615
TCRGP	LOSO	AB	3	0.87151	0.7806	0.7018	0.8758	0.8468	0.877	0.9523	0.906	0.9292	0.9257	0.9199
TCRGP	LOSO	B	all	0.88245	0.8344	0.8711	0.8771	0.8027	0.8055	0.9605	0.9071	0.9191	0.9236	0.9234
TCRGP	LOSO	B	3	0.82855	0.7816	0.5873	0.8178	0.8218	0.7205	0.9392	0.8965	0.913	0.917	0.8908
TCRGP	LOSO	A	all	0.8579	0.7683	0.7874	0.8766	0.8007	0.8214	0.93	0.847	0.9288	0.9024	0.9164
TCRGP	LOSO	A	3	0.82698	0.7693	0.7594	0.8615	0.7528	0.8444	0.8817	0.8205	0.862	0.8675	0.8507
TCRdist	LOSO	AB	all	0.828467	0.768029	0.691361	0.829517	0.862344	0.784818	0.914033	0.817875	0.819002	0.91842	0.87927
TCRdist	LOSO	AB	3	0.838007	0.769136	0.644708	0.875393	0.819861	0.772744	0.914179	0.874278	0.913024	0.920689	0.876052
TCRdist	LOSO	B	all	0.794975	0.728939	0.669961	0.774147	0.752658	0.778999	0.861882	0.787689	0.843603	0.913734	0.838139
TCRdist	LOSO	B	3	0.807892	0.774101	0.635937	0.816056	0.801614	0.655631	0.886594	0.841392	0.901366	0.919872	0.84636
TCRdist	LOSO	A	all	0.73648	0.686085	0.82171	0.778421	0.636383	0.683174	0.776976	0.709421	0.711334	0.789381	0.77191
TCRdist	LOSO	A	3	0.784586	0.715921	0.671544	0.820663	0.729357	0.768909	0.868603	0.781333	0.849179	0.84393	0.796418
Leave-one-out (LOO) experiments. Highest AUROC-score in each column is bolded.
TCRGP	LOO	AB	all	0.92222	0.9057	0.771667	0.939929	0.9343	0.9226	0.9654	0.9284	0.9589	0.9495	0.9458
TCRGP	LOO	AB	3	0.884788	0.8651	0.663611	0.877967	0.8895	0.9108	0.9456	0.9009	0.9417	0.949	0.9037
TCRGP	LOO	B	all	0.892578	0.9011	0.719722	0.89666	0.9059	0.8533	0.9573	0.906	0.9292	0.9541	0.9025
TCRGP	LOO	B	3	0.856121	0.8516	0.650833	0.821676	0.8631	0.8022	0.9326	0.9015	0.9274	0.9412	0.8691
TCRGP	LOO	A	all	0.873605	0.8669	0.752222	0.916824	0.8231	0.8753	0.9133	0.8527	0.9391	0.8902	0.9064
TCRGP	LOO	A	3	0.830494	0.8588	0.699444	0.859693	0.7697	0.8865	0.8815	0.7885	0.8956	0.8633	0.8019
TCRdist	LOO	AB	all	0.850066	0.821004	0.756944	0.865995	0.858134	0.846149	0.903319	0.83283	0.844333	0.928823	0.843126
TCRdist	LOO	AB	3	0.864227	0.849365	0.745	0.880697	0.833808	0.853019	0.896731	0.871604	0.913445	0.936525	0.862073
TCRdist	LOO	B	all	0.813888	0.785166	0.706944	0.794581	0.841113	0.812062	0.845391	0.791511	0.847189	0.928603	0.786318
TCRdist	LOO	B	3	0.826229	0.846241	0.68	0.828292	0.81507	0.735368	0.86453	0.837572	0.894196	0.935302	0.825717
TCRdist	LOO	A	all	0.753487	0.790667	0.723333	0.846461	0.669077	0.76734	0.783434	0.683832	0.746927	0.788938	0.734862
TCRdist	LOO	A	3	0.800218	0.809913	0.734306	0.852762	0.723756	0.843639	0.836772	0.716014	0.870257	0.849137	0.765628

## Sheet: VDjdb data
Leave-one-subject-out (LOSO) experiments. Equal amount of epitope-specific TCRs and negative control TCRs. Highest AUROC-score in each column is bolded.
					pp65_123-131	pp65_417-426	pp65_495-503	BMLF1_280-288	BZLF1_190-197	BRLF1_109-117	M1_58-66	HA_306-318	NS3_1073-1081	NS3_1406-1415	NS3_1436-1445	VP22_49-57	NS4B_214-222	NS3_133-142	NS3_133-142	p24_30-40	p24_48-56	p24_128-135	p24_131-140	p24_161-180	p24_223-231	Nef_90-97
Method	CV	chains	CDRs	mean	IPSINVHHY	TPRVTGGGAM	NLVPMVATV	GLCTLVAML	RAKFKQLL	YVLDHLIVV	GILGFVFTL	PKYVKQNTLKLAT	CINGVCWTV	KLVALGINAV	ATDALMTGY	RPRGEVRFL	LLWNGPMAV	GTSGSPIVNR	GTSGSPIINR	KAFSPEVIPMF	TPQDLNTML	EIYKRWII	KRWIILGLNK	FRDYVDRFYKTLRAEQASQE	GPGHKARVL	FLKEKGGL
TCRGP	LOSO	B	3	0.805518	0.8515	0.9117	0.8922	0.9256	0.8871	0.6816	0.8811	0.7058	0.6952	0.6781	0.8188	0.8013	0.8254	0.8642	0.7343	0.8935	0.8169	0.7695	0.8382	0.7499	0.7018	0.7977
TCRGP	LOSO	B	all	0.862914	0.792	0.9682	0.9039	0.9472	0.8986	0.7555	0.9326	0.748	0.7831	0.7657	0.9447	0.8136	0.8233	0.9137	0.8588	0.8862	0.9458	0.7402	0.8588	0.9923	0.8936	0.8183
TCRdist	LOSO	B	3	0.743288	0.804052	0.82876	0.792887	0.863325	0.763961	0.729476	0.831532	0.75312	0.491599	0.698225	0.746316	0.721475	0.691732	0.878144	0.84159	0.836389	0.715976	0.540884	0.70092	0.76874	0.686234	0.666991
TCRdist	LOSO	B	all	0.782977	0.761307	0.87448	0.785611	0.87168	0.856941	0.761631	0.85184	0.790319	0.599544	0.67574	0.799085	0.712569	0.695032	0.92046	0.89273	0.808447	0.799963	0.594441	0.723639	0.974513	0.818918	0.656595
RF	LOSO	B	all	0.796364	0.79	0.93	0.89	0.91	0.87	0.78	0.89	0.55	0.73	0.56	0.85	0.86	0.87	0.92	0.71	0.88	0.81	0.72	0.79	0.89	0.52	0.8
RF	LOSO	B	3	NaN	0.82	0.93	0.9	0.93	0.84	0.77	0.91	NaN	0.66	0.56	0.85	0.85	0.89	0.9	0.53	0.88	0.72	0.72	0.76	0.78	NaN	0.78
DeepTCR	LOSO	B	all	0.777182	0.775	0.86	0.874	0.907	0.782	0.564	0.893	0.602	0.626	0.704	0.849	0.823	0.664	0.876	0.843	0.858	0.794	0.771	0.656	0.844	0.703	0.83
DeepTCR	LOSO	B	3	0.7755	0.834	0.89	0.86	0.897	0.807	0.67	0.868	0.685	0.625	0.631	0.824	0.858	0.649	0.906	0.85	0.818	0.624	0.719	0.74	0.846	0.651	0.809
Leave-one-out (LOO) experiments. Equal amount of epitope-specific TCRs and negative control TCRs. Highest AUROC-score in each column is bolded.
Method	CV	chains	CDRs	mean	IPSINVHHY	TPRVTGGGAM	NLVPMVATV	GLCTLVAML	RAKFKQLL	YVLDHLIVV	GILGFVFTL	PKYVKQNTLKLAT	CINGVCWTV	KLVALGINAV	ATDALMTGY	RPRGEVRFL	LLWNGPMAV	GTSGSPIVNR	GTSGSPIINR	KAFSPEVIPMF	TPQDLNTML	EIYKRWII	KRWIILGLNK	FRDYVDRFYKTLRAEQASQE	GPGHKARVL	FLKEKGGL
TCRGP	LOO	B	3	0.739627	0.7973	0.8381	0.768	0.7819	0.7292	0.5409	0.8043	0.5628	0.4839	0.6767	0.887	0.6944	0.8133	0.8319	0.7363	0.8219	0.7662	0.755	0.8027	0.9037	0.5347	0.7416
TCRGP	LOO	B	all	0.820077	0.7681	0.93	0.7847	0.857	0.8113	0.677	0.8471	0.7896	0.6824	0.7243	0.9694	0.7099	0.8704	0.9109	0.8346	0.8169	0.8606	0.7183	0.8713	0.9824	0.8533	0.7722
TCRdist	LOO	B	3	0.711882	0.793847	0.724436	0.651885	0.772529	0.661322	0.585352	0.781348	0.6382	0.558514	0.68426	0.793981	0.777646	0.813335	0.77291	0.780246	0.801313	0.759687	0.619444	0.737061	0.816233	0.579922	0.557939
TCRdist	LOO	B	all	0.755874	0.847503	0.85219	0.6445	0.788478	0.729742	0.541522	0.769429	0.7684	0.543721	0.692781	0.884219	0.782402	0.819546	0.82347	0.848062	0.756842	0.786875	0.6425	0.768648	0.973296	0.748309	0.616782
RF	LOO	B	all	NaN	0.77	0.83	0.78	0.78	0.63	NaN	0.82	NaN	NaN	0.66	0.93	0.62	0.82	0.9	0.62	0.7	0.84	0.7	0.71	0.9	NaN	0.74
RF	LOO	B	3	NaN	0.76	NaN	0.77	0.77	0.61	NaN	0.8	NaN	NaN	NaN	0.91	0.61	0.81	0.87	NaN	0.75	0.52	0.65	NaN	0.82	NaN	0.72
DeepTCR	LOO	B	all	0.728	0.746	0.804	0.723	0.784	0.686	0.562	0.798	0.576	0.576	0.643	0.877	0.685	0.773	0.843	0.731	0.785	0.704	0.784	0.759	0.897	0.592	0.688
DeepTCR	LOO	B	3	0.709773	0.771	0.807	0.718	0.77	0.633	0.571	0.79	0.529	0.539	0.57	0.857	0.713	0.778	0.799	0.704	0.776	0.694	0.717	0.724	0.904	0.572	0.679
Stratified 200-fold crossvalidation. TCRs specific to other epitopes in the VDJdb data have been used as controls.
Method	CV	chains	CDRs	mean	IPSINVHHY	TPRVTGGGAM	NLVPMVATV	GLCTLVAML	RAKFKQLL	YVLDHLIVV	GILGFVFTL	PKYVKQNTLKLAT	CINGVCWTV	KLVALGINAV	ATDALMTGY	RPRGEVRFL	LLWNGPMAV	GTSGSPIVNR	GTSGSPIINR	KAFSPEVIPMF	TPQDLNTML	EIYKRWII	KRWIILGLNK	FRDYVDRFYKTLRAEQASQE	GPGHKARVL	FLKEKGGL
TCRGP	strat. 200-fold	B	3	0.789288	0.856997	0.86139	0.76441	0.839583	0.805397	0.678944	0.82147	0.556616	0.580622	0.70721	0.894216	0.849264	0.832667	0.82021	0.789773	0.876367	0.838709	0.790877	0.808442	0.942035	0.63477	0.814355
TCRGP	strat. 200-fold	B	all	0.843644	0.853053	0.916407	0.797468	0.843101	0.853199	0.731095	0.876753	0.798094	0.664944	0.712271	0.951781	0.854871	0.875058	0.91512	0.875984	0.87796	0.896567	0.807975	0.849286	0.993861	0.810972	0.804345
Stratified 200-fold crossvalidation with only TCRs specific to HLA-A*02 restricted epitopes. TCRs specific to other epitopes in the VDJdb data have been used as controls.
Method	CV	chains	CDRs	mean			NLVPMVATV	GLCTLVAML		YVLDHLIVV	GILGFVFTL		CINGVCWTV	KLVALGINAV			LLWNGPMAV
TCRGP	strat. 200-fold	B	3	0.793983			0.835546	0.861797		0.737598	0.848137		0.654786	0.749568			0.870446
TCRGP	strat. 200-fold	B	all	0.82054			0.85374	0.871895		0.76929	0.87178		0.735316	0.75257			0.889191
Two largest studies for training and testing. Equal amount of epitope-specific TCRs and negative control TCRs.
Method	CV	chains	CDRs	mean		TPRVTGGGAM	NLVPMVATV		RAKFKQLL		GILGFVFTL						LLWNGPMAV			KAFSPEVIPMF		EIYKRWII	KRWIILGLNK	FRDYVDRFYKTLRAEQASQE		FLKEKGGL		YLQPRTFLL
TCRGP	train-test split	B	3	0.80758		0.89	0.5886		0.9164		0.971						0.6731			0.8234		0.88	0.7523	0.8198		0.7612
TCRGP	train-test split	B	all	0.85521		0.9625	0.5829		0.9342		0.9876						0.8615			0.8241		0.8711	0.7837	0.9798		0.7647		0.8947
Leave-one-study-out experiments. Equal amount of epitope-specific TCRs and negative control TCRs.
Method	CV	chains	CDRs	mean	IPSINVHHY	TPRVTGGGAM	NLVPMVATV	GLCTLVAML	RAKFKQLL		GILGFVFTL									KAFSPEVIPMF			KRWIILGLNK	FRDYVDRFYKTLRAEQASQE		FLKEKGGL
TCRGP	leave-one-study-out	B	3	0.8356	0.7271	0.8774	0.8637	0.8519	0.8112		0.8963									0.9096			0.7995	0.7716		0.8477
TCRGP	leave-one-study-out	B	all	0.8604	0.6954	0.9088	0.8445	0.9033	0.7894		0.921									0.9097			0.844	0.9789		0.809

## Sheet: VDJdb data, list of studies
Epitope	Study	Number of subjects	Number of TCRs	Number of unique TCRs
IPSINVHHY	PMID:17459926	6	22	20
IPSINVHHY	PMID:24512815	1	15	15
IPSINVHHY	PMID:23267020	5	12	12
IPSINVHHY	PMID:22044339	3	10	10
IPSINVHHY	PMID:23028307	1	5	5
IPSINVHHY	PMID:19864595	1	1	1
TPRVTGGGAM	PMID:21555537	7	53	45
TPRVTGGGAM	PMID:23267020	5	20	19
TPRVTGGGAM	PMID:24512815	1	19	17
TPRVTGGGAM	PMID:25339770	2	34	17
TPRVTGGGAM	PMID:22210916	3	29	15
TPRVTGGGAM	PMID:28636589	5	11	10
TPRVTGGGAM	PMID:17709536	4	11	9
TPRVTGGGAM	PMID:9971792	1	5	5
TPRVTGGGAM	PMID:23637823	1	2	2
NLVPMVATV	PMID:19017975	10	113	62
NLVPMVATV	PMID:21555537	3	35	33
NLVPMVATV	PMID:28636592	10	30	27
NLVPMVATV	PMID:21135165	5	35	26
NLVPMVATV	PMID:19014475	25	44	25
NLVPMVATV	https://github.com/antigenomics/vdjdb-db/issues/252	7	23	18
NLVPMVATV	PMID:23267020	4	12	12
NLVPMVATV	PMID:16237109	7	14	11
NLVPMVATV	PMID:24512815	2	11	10
NLVPMVATV	PMID:25925682	2	9	9
NLVPMVATV	PMID:28623251	2	9	9
NLVPMVATV	PMID:28636589	4	12	9
NLVPMVATV	PMID:9971792	1	9	9
NLVPMVATV	PMID:24069285	1	8	8
NLVPMVATV	PMID:28423320	5	16	7
NLVPMVATV	PMID:25801351	5	6	5
NLVPMVATV	PMID:17709536	2	5	4
NLVPMVATV	PMID:24711416	1	6	4
NLVPMVATV	PMID:28934479	1	3	3
NLVPMVATV	PMID:11930311	2	2	2
NLVPMVATV	PMID:19864595	1	2	2
NLVPMVATV	PMID:25339770	1	6	2
NLVPMVATV	PMID:26429912	1	2	2
NLVPMVATV	PMID:19542454	1	1	1
GLCTLVAML	PMID:12504586	3	39	37
GLCTLVAML	PMID:10925283	12	46	34
GLCTLVAML	PMID:28636592	6	34	27
GLCTLVAML	PMID:21555537	5	28	21
GLCTLVAML	PMID:23267020	6	24	21
GLCTLVAML	PMID:24512815	2	26	21
GLCTLVAML	PMID:28636589	4	34	20
GLCTLVAML	PMID:19017975	6	40	16
GLCTLVAML	PMID:27645996	3	9	9
GLCTLVAML	https://github.com/antigenomics/vdjdb-db/issues/243	2	10	8
GLCTLVAML	PMID:11046006	3	4	3
GLCTLVAML	PMID:25339770	1	4	3
GLCTLVAML	PMID:21124993	1	1	1
RAKFKQLL	PMID:24512815	4	103	99
RAKFKQLL	PMID:23267020	5	60	58
RAKFKQLL	PMID:21555537	8	62	49
YVLDHLIVV	PMID:24512815	1	36	35
YVLDHLIVV	PMID:23267020	5	30	30
GILGFVFTL	PMID:28636592	15	74	61
GILGFVFTL	PMID:29483513	9	56	31
GILGFVFTL	PMID:28636589	7	21	20
GILGFVFTL	PMID:28423320	8	39	17
GILGFVFTL	PMID:27645996	3	16	13
GILGFVFTL	PMID:28250417	4	18	13
GILGFVFTL	PMID:25339770	2	11	8
GILGFVFTL	PMID:18275829	1	3	2
GILGFVFTL	PMID:12796775	1	1	1
PKYVKQNTLKLAT	PMID:28636589	4	29	25
PKYVKQNTLKLAT	PMID:12466894	3	23	23
PKYVKQNTLKLAT	PMID:11060013	1	1	1
PKYVKQNTLKLAT	PMID:11877480	1	1	1
PKYVKQNTLKLAT	PMID:21081917	1	1	1
PKYVKQNTLKLAT	PMID:25015819	1	1	1
CINGVCWTV	PMID:27645996	5	21	21
CINGVCWTV	PMID:28146579	2	55	19
KLVALGINAV	PMID:27252176	4	65	65
ATDALMTGY	PMID:21160049	6	141	135
ATDALMTGY	PMID:28146579	1	11	4
RPRGEVRFL	PMID:20139278	5	68	29
LLWNGPMAV	PMID:28103239	1	195	180
LLWNGPMAV	https://github.com/antigenomics/vdjdb-db/issues/193	2	19	12
LLWNGPMAV	PMID:28975614	1	3	3
LLWNGPMAV	https://github.com/antigenomics/vdjdb-db/issues/243	1	6	3
GTSGSPIVNR	PMID:28945243	11	65	59
GTSGSPIINR	PMID:28945243	8	51	46
KAFSPEVIPMF	PMID:17121793	17	50	48
KAFSPEVIPMF	PMID:22278241	10	38	36
KAFSPEVIPMF	PMID:18802118	9	21	21
KAFSPEVIPMF	PMID:21562156	6	16	16
KAFSPEVIPMF	PMID:17287271	1	8	4
KAFSPEVIPMF	PMID:23161907	1	1	1
TPQDLNTML	PMID:16982909	11	24	22
TPQDLNTML	PMID:25911754	8	25	19
TPQDLNTML	PMID:21752903	2	3	2
EIYKRWII	PMID:17287271	2	15	13
EIYKRWII	PMID:25320304	8	60	45
EIYKRWII	PMID:21562156	2	6	6
KRWIILGLNK	PMID:23521884	4	67	41
KRWIILGLNK	PMID:21135165	8	43	32
KRWIILGLNK	PMID:17893201	6	40	28
KRWIILGLNK	PMID:25320304	3	30	21
KRWIILGLNK	PMID:15753288	3	22	15
KRWIILGLNK	PMID:17287271	1	6	4
KRWIILGLNK	PMID:21562156	2	4	4
FRDYVDRFYKTLRAEQASQE	PMID:28993513	4	86	61
FRDYVDRFYKTLRAEQASQE	PMID:27111229	13	55	35
GPGHKARVL	PMID:21555537	1	62	53
FLKEKGGL	PMID:25320304	8	51	34
FLKEKGGL	PMID:17287271	4	34	27
FLKEKGGL	PMID:21562156	3	7	7
FLKEKGGL	PMID:15596521	4	5	5
FLKEKGGL	PMID:22210916	1	5	3
FLKEKGGL	PMID:17893201	1	2	2
